1 **Title:** Influenza-induced oxidative stress sensitizes lung cells to bacterial toxin-mediated  
2 necroptosis

3

4 **Summary:** Here we demonstrate that Influenza A virus (IAV) infection synergistically  
5 sensitizes lung cells to bacterial pore-forming toxin (PFT)-mediated necroptosis.

6 Moreover, this contributes to the severity of lung injury that is observed during co- and  
7 secondary infection with *Streptococcus pneumoniae*. IAV-induced oxidative stress was

8 identified as a key factor contributing to cell sensitization and induction of oxidative

9 stress *sans* virus was sufficient to synergistically enhance susceptibility to PFT-

10 mediated killing. Our results advance our understanding on the molecular basis of co-

11 and secondary bacterial infection to influenza and identifies necroptosis inhibition and

12 antioxidant therapy as potential intervention strategies.

13

14 **Authors:** Norberto Gonzalez-Juarbe<sup>1,5\*</sup>, Ashleigh N. Riegler<sup>1</sup>, Alexander S. Jureka<sup>2</sup>,

15 Ryan P. Gilley<sup>3</sup>, Jeffrey Brand<sup>4</sup>, John E. Trombley<sup>4</sup>, Ninecia R. Scott<sup>1</sup>, Peter H. Dube<sup>3</sup>,

16 Chad M. Petit<sup>2</sup>, Kevin S. Harrod<sup>4</sup>, and Carlos J. Orihuela<sup>1</sup>

17 **Author Affiliations:** <sup>1</sup>Department of Microbiology, The University of Alabama at

18 Birmingham, Birmingham, Alabama 35294-2170, USA. <sup>2</sup>Department of Biochemistry

19 and Molecular Genetics, The University of Alabama at Birmingham, Birmingham,

20 Alabama 35294-2170, USA. <sup>3</sup>Department of Microbiology, Immunology and Molecular

21 Genetics, The University of Texas Health Science Center at San Antonio, San Antonio,

22 TX 78229. <sup>4</sup>Department of Anesthesiology and Perioperative Medicine, The University

23 of Alabama at Birmingham, Birmingham, Alabama 35294-2170, USA. <sup>5</sup>Infectious

24 Diseases and Genomic Medicine Group, J Craig Venter Institute, 9605 Medical Center  
25 Drive, Suite 150, Rockville, MD 20850.

26

27 **\*Corresponding Author Details:** Dr. Norberto Gonzalez-Juarbe, Infectious Diseases  
28 and Genomic Medicine Group, J Craig Venter Institute, 9605 Medical Center Drive,  
29 Suite 150, Rockville, MD 20850. Email: [ngonzale@jcvi.org](mailto:ngonzale@jcvi.org)

30 **Author Contributions:** NG-J, KSH and CJO wrote and edited the paper. NG-J, ANR,  
31 RPG, ASJ, KSH, PHD, CMP and CJO designed the experiments. NG-J, ANR, RPG,  
32 JB, JET, PHD, NRS, and ASJ executed the experiments.

33

34 **Financial Support:** NG-J received support from NIH training grant AI007051 and J.  
35 Craig Venter Institute start-up funds. ASJ received training support from NIH grant  
36 GM008111. ANR received support from training grant AI007051. CMP was supported  
37 by NIH AI134693. KSH received support from NIH AI111475. PHD was supported by  
38 NIH grants AI070412, CA17286, AI113724 and RP140565 from CPRIT. CJO received  
39 support from NIH grants AI114800, AG055144 and AHA grant 16GRNT30230007.

40

41 **Running Head:** Influenza primes lung cells for necroptosis

42 **Descriptor Number:** 10.10 Pathogenic Mechanisms of Infections

43 **Manuscript Word Count:** 3133/3500 (excluding abstract, references, and legends)

44

45

46 **ABSTRACT**

47 **Rationale:** Pneumonia caused by Influenza A virus (IAV) co- and secondary bacterial  
48 infections are characterized by their severity. Previously we have shown that pore-  
49 forming toxin (PFT)-mediated necroptosis is a key driver of acute lung injury during  
50 bacterial pneumonia. Here, we evaluate the impact of IAV on PFT-induced acute lung  
51 injury during co- and secondary *Streptococcus pneumoniae* (*Spn*) infection.

52 **Objectives:** Determine the impact of IAV infection on bacterial PFT-mediated lung  
53 epithelial cell (LEC) necroptosis. Determine the molecular basis for increased sensitivity  
54 and if inhibition of necroptosis or oxidative stress blocks IAV sensitization of LEC to  
55 PFT.

56 **Methods:** Mice and cells were challenged with IAV followed by *Spn*. Necroptosis was  
57 monitored by measuring cell death at fixed time points post-infection and  
58 immunofluorescent detection of necroptosis. Wildtype mice and LEC were treated with  
59 necroptosis inhibitors. Necroptosis effector molecule MLKL deficiency was tested for  
60 infection synergy. Oxidative damage to DNA and lipids as result of infection was  
61 measured *in vitro* and *in vivo*. Necroptosis and anti-oxidant therapy efficacy to reduce  
62 disease severity was tested *in vivo*.

63 **Measurements and Main Results:** IAV synergistically sensitized LEC for PFT-  
64 mediated necroptosis *in vitro* and in murine models of *Spn* co-infection and secondary  
65 infection. Pharmacological induction of oxidative stress *sans* virus sensitized cells for  
66 PFT-mediated necroptosis. Necroptosis inhibition reduced disease severity during  
67 secondary bacterial infection.

68 **Conclusions:** IAV-induced oxidative stress sensitizes LEC for PFT-mediated  
69 necroptosis. This is a new molecular explanation for severe influenza-associated  
70 bacterial infections. Necroptosis inhibitors are potential therapeutic strategies to reduce  
71 IAV-primed bacterial pneumonia severity.

72

73 **ABSTRACT LENGTH:** 248/250 words

74

75 **KEY WORDS:** Pneumonia, Influenza A virus, *Streptococcus pneumoniae*, epithelial  
76 cells, necroptosis, cell death, inflammation

77

## 78 INTRODUCTION

79 Influenza A virus (IAV) is the most common cause of human influenza (flu) (1),  
80 infecting 4-8% of the U.S. population annually (2). Worldwide, the World Health  
81 Organization estimates that flu affects approximately 1 billion individuals annually, with  
82 3 to 5 million cases of severe disease and a resulting 300,000 to 500,000 deaths (3).  
83 While IAV alone is capable of considerable morbidity and mortality, clinical and  
84 molecular epidemiology have shown that the most serious infections are frequently  
85 associated with co-infections or a secondary infection with a bacterial pathogen.  
86 *Streptococcus pneumoniae* (*Spn*; the pneumococcus) is the leading cause of  
87 community-acquired pneumonia and by far the most common bacterium associated with  
88 IAV infections (4). Highlighting the seriousness of IAV/*Spn* co-infections, 34%-55% of  
89 the deaths linked to the 2009 IAV pandemic were associated with bacterial infections,  
90 with *Spn* the most common bacteria identified (5, 6).

91 Over the past 20 years a number of seminal discoveries have helped to explain, at  
92 the molecular level, the synergy observed during IAV/*Spn* super-infection. Key findings  
93 include the observation that IAV neuraminidase cleaves terminal sialic acid on host cell  
94 glycoconjugates exposing normally cryptic antigens for bacterial attachment (7). Viral  
95 neuraminidase-cleaved sialic acid serves as a nutrient for *Spn* and promotes bacterial  
96 outgrowth (8). IAV-induced down regulation of ion channels in bronchial epithelial cell  
97 results in dysregulated pulmonary fluid homeostasis that favors bacterial replication (9).  
98 Fever, cytokines, and alarmins released from IAV-infected dying cells elicit a  
99 transcriptional response from *Spn* that causes it to disperse from biofilms and enhances  
100 its virulence (10). In addition, IAV-induced interferon (IFN) gamma down regulates

101 expression of scavenger receptors on macrophages, such as MARCO, that are required  
102 for uptake of *Spn* in absence of capsule specific antibody (11). Finally, the immune  
103 response induced by IAV is inappropriate for clearance of bacteria and enhances  
104 pulmonary injury (12, 13). It is noteworthy, that the majority of this work has not focused  
105 on events that occur within lung epithelial cells (LEC), which are the nexus of co-  
106 infection.

107         Necroptosis is a programmed form of cell death that results in host cell  
108 membrane failure, i.e. necrosis. It is inflammatory due to the release of cytoplasmic  
109 contents that serve as alarmins. Canonically, necroptosis is regulated by receptor-  
110 interacting serine-threonine kinase (RIPK)1, that activates RIPK3. Subsequently,  
111 RIPK1/RIPK3 activates the necroptosis effector molecule MLKL through  
112 phosphorylation, p-MLKL, which targets cell membranes leading to cell rupture and  
113 death (14, 15). Importantly, both IAV and bacterial pore-forming toxins (PFT), such as  
114 pneumolysin produced by *Spn*, have recently been shown to induce necroptosis of LEC  
115 (16-20). For IAV, this has been shown to be the result of viral RNA interactions with DAI  
116 (also known as Zbp or DLM-1), a sensor for cytoplasmic nucleic acid, which activates  
117 RIPK3. Necroptosis of virally infected LEC is thought to be beneficial as RIPK3 KO and  
118 MLKL/FADD double KO mice were considerably more susceptible to IAV (18). More  
119 recently, our research group has shown that membrane damage caused by the PFT of  
120 *Spn* and *Serratia marcescens* resulted in ion dysregulation which activated RIPK1 (21).  
121 In contrast to IAV infection, necroptosis during bacterial pneumonia was detrimental and  
122 exacerbated bacterial outgrowth, pulmonary injury, and loss of alveolar-capillary  
123 integrity (21, 22). Critically and up to this point, the role of necroptosis during

124 IAV/bacteria co-infection was not known. Herein we determined its consequence and  
125 determined the underlying molecular mechanism responsible using *Spn* as the  
126 prototype bacterial pathogen.

127

128

## 129 **METHODS**

130 **Ethics Statement.** Animal experiments were approved by the Institutional Animal Care  
131 and Use Committee at The University of Alabama at Birmingham (Protocol # 20358).  
132 Human LEC were harvested from whole lung sections obtained from the International  
133 Institute for the Advancement of Medicine (23). The use of primary tissue, obtained in  
134 de-identified fashion, does not meet the criteria for human subject research.

135

136 **IAV and *Spn*.** Pandemic H1N1 A/California/7/2009 (pdmH1N1) and H1N1 A/Puerto  
137 Rico/8/1934 (PR8) influenza viruses were propagated in MDCK cells. *Spn* serotype 4  
138 strain TIGR4 and its derivatives were used for all studies (24). TIGR4 mutants deficient  
139 in *ply* ( $\Delta ply$ ), the gene encoding pneumolysin, and *spxB* ( $\Delta spxB$ ), the gene encoding  
140 pyruvate oxidase, have been described (25). We also used mutants provided by Dr.  
141 Jeffrey Weiser (New York University, NY). These were matched strains of TIGR4  
142 (TIGR4<sub>JW</sub>), TIGR4 lacking pneumolysin, TIGR4<sub>JW</sub>  $\Delta ply$ ), a TIGR4 point mutant deficient  
143 in pore formation (TIGR4<sub>JW</sub> W433F), and a corrected mutant (TIGR4<sub>JW</sub> *ply*+) (26); these  
144 were used as a set. Recombinant pneumolysin (rPly) was purified from *E. coli* (27).  
145 *Staphylococcus aureus* alpha-toxin was purchased (Sigma-Aldrich, St. Louis, MO).

146

147 **Animal strains and infections.** Male and female 8-week-old C57BL/6 mice were  
148 obtained from Taconic Biosciences (Rensselaer, NY). MLKL KO mice were made  
149 available by Dr. Warren Alexander (Walter and Eliza Hall Institute of Medical Research  
150 Parkville, Victoria, Australia) (28). For IAV/*Spn* co-infection, 8-week-old C57BL/6 mice  
151 were intranasally challenged with 250 PFU PR8. Five days post-influenza challenge,  
152 mice received by forced aspiration  $5 \times 10^5$  CFU *Spn* (29). For studies involving *Spn*  
153 secondary infection, i.e. after viral clearance, mice were challenged with 250 PFU  
154 pdmH1N1 and ten days post-influenza, challenged with  $10^3$  CFU *Spn*.

155

156 **Cell Infections.** A549 type II alveolar epithelial cells (23), MH-S mouse alveolar  
157 macrophages (30), and primary normal human bronchiolar epithelial cells (23), were  
158 infected with IAV at MOI 2 for 2 hours, and subsequently challenged with *Spn* at an MOI  
159 10 for 4 hours. The majority of chemical inhibitors were obtained from Sigma-Aldrich.  
160 Exceptions include necrosulfonamide (Tocris Bioscience, QL, UK), GSK'872 and Nec1s  
161 (BioVision, Milpitas, CA), oseltamivir carboxylate (MCE, Monmouth, NJ), TNFR inhibitor  
162 R-7050 and TNF- $\alpha$  inhibitor SPD-304 (Cayman Chemicals, Ann Arbor, MI) and  
163 Pimodivir (AdooQ Bioscience, Irvine, CA). Cells receiving inhibitors were treated  
164 continuously beginning 1-hour prior to IAV infection. Pimodivir treated cells received the  
165 drug 2-hours prior to IAV challenge. A549 cells deficient in MLKL have been previously  
166 described (16). Cell death was evaluated by detection of lactate dehydrogenase (LDH)  
167 in culture supernatants (22). The presence of reactive oxygen species (ROS) was  
168 measured with the H<sub>2</sub>-DCF assay (Thermo Fisher Scientific, Waltham, MA). Lipid  
169 peroxidation was detected with the lipid peroxidation malondialdehyde (MDA) assay



170 (Abcam). Antibodies against 8-hydroxydeoxyguanosine, an oxidative stress-mediated  
171 DNA damage marker, and HNE-J, a lipid peroxidation marker, were purchased  
172 (Abcam).

173

174 **Histology and Microscopy.** The methods used for tissue processing, sectioning, and  
175 immunofluorescent microscopy are described (17, 29, 31). Images were captured using  
176 a Zeiss AxioXam MRm Rev3 and/or MRc cameras attached to a Zeiss AxioImager Z1  
177 epifluorescent microscope (Carl Zeiss, Thornwood, NY) or a Leica LMD6 with  
178 DFC3000G-1.3-megapixel monochrome camera (Leica Biosystems, Buffalo Grove, IL).  
179 TUNEL (Promega, Madison, WI) and Annexin V (Abcam, Cambridge, UK) staining was  
180 done per manufacturer's instruction. Cleaved caspase-3 staining was done using anti-  
181 cleaved-caspase-3 antibody (Abcam). Mean fluorescent intensity and densitometry of  
182 immunoblots was measured using ImageJ (32).

183

184 **Immunoblots and ELISA.** Western blots for MLKL (1:1000, #37705, Cell Signaling  
185 Technologies), p-MLKL (1:1000, #37333S, Cell Signaling Technologies) and  
186 cytoskeletal actin (1:10000, #A300-485A, Bethyl Laboratories Inc., Montgomery, TX),  
187 were done as previously described (33). ELISA-based measurements for IFN- $\beta$ , IFN- $\alpha$   
188 and TNF- $\alpha$  were done using kits from PBL Assay Science (Piscataway, NJ) and  
189 InvivoGen (San Diego, CA).

190

191 **Statistical analyses.** For non-parametric multiple group analyses we used a Kruskal-  
192 Wallis H test with Dunn's post-hoc analysis. For parametric grouped analyses we used

193 ANOVA with Sidak's post-hoc analysis. For data with a single independent factor of two  
194 groups we used a Mann-Whitney U test. Survival comparisons were assessed using  
195 Log-rank (Mantel-Cox) test. Asterisks denote the level of significance observed: \* =  $P \leq$   
196 0.05; \*\* =  $P \leq 0.01$ ; \*\*\* =  $P \leq 0.001$ ; \*\*\*\* =  $P \leq 0.0001$ . Statistical analyses were  
197 calculated using Prism 8 (GraphPad Software: La Jolla, CA).

198

199

## 200 **RESULTS**

201 **Necroptosis is synergistically increased during IAV/Spn co-infection.** Using an  
202 established mouse model of co-infection (34, 35), we recapitulated the synergy known  
203 to occur between IAV and *Spn*. Briefly, we observed a >50-fold increase in the amount  
204 of *Spn* present in bronchoalveolar lavage fluid (BALF) and blood (**Fig. 1A, B**), as well as  
205 a significant decrease in time to death following IAV/*Spn* challenge versus *Spn* or IAV  
206 alone (**Fig. 1C**). Importantly, ongoing IAV infection synergistically enhanced the number  
207 of lung cells undergoing necroptosis after *Spn* challenge; necroptosis activity in frozen  
208 lung sections was inferred by immunofluorescent detection of phosphorylated MLKL (p-  
209 MLKL) (**Fig. 1D, E**).

210 To validate this *in vivo* observation and begin to dissect the molecular  
211 mechanisms underlying IAV-enhanced bacteria-induced necroptosis, we used an  
212 established *in vitro* co-infection model (36). Briefly, A549 type II alveolar epithelial cells  
213 were infected with either pdmH1N1 or PR8 at a MOI of 2 for two hours and then  
214 challenged with *Spn* at a MOI of 10 for another four hours. Importantly, A549  
215 cytotoxicity was synergistic increased in cells challenged with both pathogens (**Fig. 2A**,

216 **Fig. E1**). Similar results were also observed with MH-S murine alveolar macrophages  
217 (**Fig. E2**), indicating influenza-mediated sensitization to necroptosis is not restricted to  
218 airway epithelial cells. Of note, the enhanced death of A549 co-infected cells occurred  
219 without significant differences in bacterial titers versus control (**Fig. E3A**); indicating that  
220 the increased levels of necroptosis observed *in vivo* were not solely due to increased  
221 bacterial burden. Tumor necrosis factor (TNF) and IFN responses have been shown to  
222 promote necroptosis during viral infection (37). Along such lines, inhibition of TNF  
223 receptor 1 or blocking of TNF- $\alpha$  by pre-treatment of cells with R7050 or SPD304,  
224 respectively, did not reduce influenza-induced cell death potentiation in A549 cells *in*  
225 *vitro* (**Fig. E3B**). Moreover, the timeframe of the *in vitro* model did not lead to significant  
226 increases in the interferon response (**Fig. E3C**). Altogether, no evidence supporting a  
227 role for the synergistic initiation of receptor-mediated apoptosis was found *in vitro* or *in*  
228 *vivo* under the conditions tested (**Fig E4**).

229

230 **Pore-forming toxin activity is required for Spn-induced necroptosis during co-**  
231 **infection.** *Spn*-mediated cytotoxicity of LEC was found to require the pore-forming  
232 activity of its PFT pneumolysin (**Fig 2A, B**). What is more, when A549 cells were treated  
233 with inhibitors of MLKL, necrosulfonamide (NSA) (**Fig 2A**) or RIPK3, GSK' 872 (**Fig.**  
234 **E5**), the enhanced sensitivity of these cells to *Spn* killing was lost. Challenge of IAV-  
235 infected A549 cells with recombinant pneumolysin (rPly) or  $\alpha$ -toxin (the PFT of  
236 *Staphylococcus aureus*, the second most common isolate during SBI to influenza (38)),  
237 recapitulated the potentiation of cell cytotoxicity observed with live bacterial infection  
238 (**Fig. E6**). Potentiation of necroptosis by IAV was confirmed by immunoblot and

239 immunofluorescent staining which showed enhanced amounts of p-MLKL in A549 cells  
240 (**Fig. E7**). Further supporting a key role for necroptosis was the observation that A549  
241 cells deficient in MLKL were protected against exacerbated PFT-mediated cell death  
242 after influenza infection (**Fig. 2C**). Moreover, that the same results were observed with  
243 primary normal human bronchiolar epithelial cells (nHBE) *ex vivo* (**Fig. E8**).

244

#### 245 **IAV-induced oxidative stress sensitizes cells *in vitro* for PFT-mediated**

246 **necroptosis.** IAV-mediated oxidative stress has potent effects on pulmonary epithelial  
247 cells and the immune system (39). Therefore, it seemed plausible that the oxidative  
248 stress induced by the virus may be contributing towards the potentiation of  
249 pneumolysin-mediated necroptosis. In support of this notion, we observed that  
250 respiratory epithelial cells challenged *in vitro* with pdmH1N1 or PR8 showed increased  
251 levels of lipid peroxidation (**Fig. 3A, Fig. E9A**) as measured by MDA and cellular ROS  
252 (**Fig. 3B, Fig. E9B**) as measured using H<sub>2</sub>-DCF. Importantly, and despite not having an  
253 effect on viral titers during the course of infection (**Fig. 3C**), pretreatment of A549 cells  
254 with the superoxide dismutase mimetic Tempol (40) prior to viral challenge reduced cell  
255 death and MLKL activation in co-infected cells (**Fig. 3D-E**). Directly implicating oxidative  
256 stress as a primer for PFT-induced necroptosis, treatment of cells with paraquat (22)  
257 enhanced the toxicity of rPly towards LEC and the observed potentiating effect of  
258 paraquat was abolished by treatment with Tempol (**Fig. 3F**). Identical results were  
259 observed using nHBE *ex vivo* (**Fig. 3G**) and replicated by addition of exogenous H<sub>2</sub>O<sub>2</sub> in  
260 place of paraquat to A549 epithelial cells prior to rPly challenge (**Fig. E10**). Note that  
261 *Spn* also produces H<sub>2</sub>O<sub>2</sub> via its metabolic enzyme SpxB (40). Yet, IAV potentiation of

262 cell death was also observed in A549 cells challenged with *Spn*  $\Delta$ *spxB* (**Fig. E11**),  
263 indicating that the priming effect of viral-induced ROS was sufficient. Importantly,  
264 inhibition of ROS in A549 cells with rotenone + thallium trifluoroacetate (mitochondria-  
265 dependent ROS inhibitor), apocynin (ADPH-dependent ROS inhibitor), allopurinol  
266 (xanthine oxidase-dependent ROS inhibitor) or mefenamic acid (cyclooxygenase-  
267 dependent ROS inhibitor) all conferred protection against death caused by co-infection  
268 (**Fig. 3H**). This results suggests that ROS potentiation of necroptosis may come from  
269 multiple cellular sources. Lastly, and to further probe the specificity of oxidative stress  
270 as a primer for necroptosis, we tested whether blockage of viral neuraminidase activity  
271 with oseltamivir (41) or treatment of cells with Pimodivir (VX-787) (42), a non-nucleoside  
272 polymerase basic protein 2 subunit inhibitor, impacted cell death. Neither of which did  
273 (**Fig. E12A**), despite the fact that viral titers were decreased by Pimodivir treatment  
274 (**Fig. E12B**).

275

276 **IAV induced oxidative stress remains beyond viral clearance and maintains**  
277 **susceptibility to bacterial toxin mediated necroptosis.** We examined whether  
278 residual oxidative stress induced by IAV helped to explain the enhanced susceptibility to  
279 bacterial infection that occurs even after IAV is cleared; i.e. in a secondary infection  
280 model. Lung sections from pdmH1N1-challenged mice 10 days post-IAV infection  
281 showed considerable evidence of oxidative damage to DNA of as well as lipid  
282 peroxidation (IF 8-Hydroxydeoxyguanosine and 4-Hydroxynonenal staining, respectively  
283 (43, 44)) in pulmonary tissue (**Fig. 4A-D**). Notably, these mice were confirmed to not  
284 have detectable virus (**Fig. 4E**). Similar to co-infection results (see Fig 1), if these mice

285 were challenged with *Spn*, we observed a >100-fold increase in bacterial lung titers 2  
286 days after *Spn* challenge (**Fig. 5A**). This was concomitant with greater lung  
287 consolidation, immune cell infiltration (**Fig. E13**), and substantially enhanced levels of  
288 lung necroptosis in co-infected mice versus those with *Spn* alone (**Fig. 5B-D**).  
289 Importantly, mice challenged with TIGR4  $\Delta ply$  in our secondary infection model had  
290 MLKL activation levels and bacterial titers equivalent to our negative control, i.e. mice  
291 infected with wildtype TIGR4 but also receiving the necroptosis inhibitor Nec-1s (**Fig.**  
292 **5E-G, Fig. E14**). What is more, TIGR4  $\Delta ply$  challenged IAV-infected mice had  
293 decreased mortality versus controls (**Fig. 5H**). Interestingly, Tempol treatment at 12 and  
294 24 hours post-*Spn* infection reduced the amount of necroptosis occurring in the airway  
295 in our secondary IAV/*Spn* infection model. This was despite not having an observed  
296 effect on *in vivo* levels of lipid oxidation (**Fig. 6A-E**). Tempol treatment also reduced  
297 bacterial burden within the airway of infected mice (**Fig. 6F**). Thus, necroptosis  
298 sensitizing ROS is primarily due to the virus, persisted beyond detectable IAV infection,  
299 and acted directly to sensitize the cell for necroptosis.

300

301 ***In vivo* necroptosis inhibition reduces severity of secondary bacterial infection to**  
302 **influenza.** While no changes in oxidative stress induced DNA damage were observed  
303 (**Fig. E15**), MLKL deficient mice with secondary *Spn* infection had reduced bacterial  
304 titers, reduced lung consolidation, and a reduction in overall TUNEL positive staining in  
305 lung sections (a general marker of cell death) (**Fig. 7A-E**). In addition, lungs of MLKL  
306 KO Mice showed decreased levels of IFN- $\alpha$  and - $\beta$ , suggesting a possible role for  
307 necroptosis in the IFN response during secondary infections (**Fig. 7F-G**). Most

308 importantly, MLKL KO mice had greater survival versus control in our secondary  
309 infection model (**Fig. 7H**). Altogether, our results implicate oxidative-stress enhanced  
310 PFT-mediated necroptosis activity as a major driver of disease severity and lung injury  
311 during co- and secondary infections to influenza.

312

313

## 314 **DISCUSSION**

315         The molecular mechanisms of IAV subversion of cellular defenses and cell fate  
316 continues to be investigated (45). Only recently has it become apparent that necroptosis  
317 is essential for control of virus replication during infection (18). Herein we demonstrate  
318 that oxidative stress triggered by IAV infection plays a role in the potentiation of PFT-  
319 induced necroptosis in respiratory cells. Oxidative stress is pleiotropic and capable of  
320 oxidizing proteins and lipid membranes, damaging nucleic acid, and potentially altering  
321 cellular energy levels or ion homeostasis of the cell. The latter were shown to be  
322 triggers for non-canonical activation of necroptosis within bacteria-infected cells (16, 17,  
323 22). During viral infection necroptosis is canonically activated through death receptor  
324 signaling and/or recognition of viral RNA and DNA by DAI (37). Whether and how the  
325 latter pathways are sensitized as result of IAV induced ROS or if an independent  
326 mechanism is responsible remains unclear, and detailed studies are now warranted to  
327 discern key similarities and differences between these events. Importantly, increased  
328 susceptibility to PFT-mediated necroptosis was still observed even when IAV replication  
329 was blocked with Pimodivir. Moreover, Tempol-mediated protection against priming for  
330 PFT killing was applicable to both the co-infection and secondary infection scenario, the

331 latter when virus is no longer present. This suggests the mechanism responsible for  
332 IAV-mediated necroptosis potentiation is directly affected by acute intracellular ROS  
333 levels and independent of viral effectors. Our results showing no differences in caspase  
334 activation suggests the responsible mechanism is also independent of canonical  
335 apoptotic and pyroptotic pathways, although it is likely these mechanisms are  
336 contributory to overall disease and occurring in parallel during natural infection.

337         Sensitization to necroptosis most likely contributes to a variety of clinical  
338 problems during co- and secondary pneumonia such as acute respiratory distress  
339 syndrome and sepsis; a consequence of the enhanced level of cell death and release of  
340 pro-inflammatory alarmins. It is noteworthy that IAV has been specifically demonstrated  
341 to drive *Spn* development of otitis media (46). Critically it is unknown if other viruses  
342 enhance permissiveness for PFT-mediated necroptosis and this is an important avenue  
343 of future investigation. In support of this notion, a wide variety of viruses have been  
344 shown to induce oxidative stress in host cells by a variety of means (47). For example,  
345 respiratory syncytial virus does so by modulating levels of antioxidant enzymes (48).  
346 Thus, it is likely that this phenomena is not restricted to IAV. Our prior published work  
347 (17, 22), and that with *S. aureus*  $\alpha$ -toxin herein, which showed a wide variety of PFT-  
348 producing bacteria can instigate necroptosis of LEC suggests viral-enhanced PFT-  
349 mediated necroptosis is not restricted to the pathogen *Spn*. What is more, this synergy  
350 may be an important contributor to enhanced disease severity at other anatomical sites  
351 where virus and bacteria can co-infect.

352         Finally, our results suggest that inhibition of necroptosis may be a viable  
353 therapeutic treatment during IAV mediated co- or secondary infections, although the



354 possibility remains that necroptosis inhibition may promote viral replication during co-  
355 infection, an aspect which needs to be studied carefully (unpublished results with  
356 primary NHBEs suggest it does not). Altogether, our results provide a new molecular  
357 explanation for how influenza infection enhances permissiveness for secondary  
358 bacterial infection. We demonstrate that PFT-mediated necroptosis is enhanced as  
359 result of oxidative stress cause by prior or ongoing viral replications. Increased  
360 sensitivity to PFT-mediated necroptosis in turn worsens pulmonary damage and creates  
361 an environment that is further permissive for bacterial replication. The fact that oxidative  
362 stress induced by virus and PFT production are common across a wide range of viral  
363 and bacterial pathogens, respectively, suggests this is an important aspect of human  
364 infectious disease pathogenesis.

365

366 **REFERENCES**

- 367 1. Morens DM, Taubenberger JK, Fauci AS. Predominant Role of Bacterial Pneumonia  
368 as a Cause of Death in Pandemic Influenza: Implications for Pandemic Influenza  
369 Preparedness. *Journal of Infectious Diseases* 2008; 198: 962-970.
- 370 2. Tokars JI, Olsen SJ, Reed C. Seasonal Incidence of Symptomatic Influenza in the  
371 United States. *Clin Infect Dis* 2018; 66: 1511-1518.
- 372 3. Clayville LR. Influenza update: a review of currently available vaccines. *P T* 2011; 36:  
373 659-684.
- 374 4. van der Sluijs KF, van der Poll T, Lutter R, Juffermans NP, Schultz MJ. Bench-to-  
375 bedside review: Bacterial pneumonia with influenza - pathogenesis and clinical  
376 implications. *Critical Care* 2010; 14: 1-8.
- 377 5. Gill JR, Sheng ZM, Ely SF, Guinee DG, Beasley MB, Suh J, Deshpande C, Mollura  
378 DJ, Morens DM, Bray M, Travis WD, Taubenberger JK. Pulmonary pathologic  
379 findings of fatal 2009 pandemic influenza A/H1N1 viral infections. *Arch Pathol*  
380 *Lab Med* 2010; 134: 235-243.
- 381 6. Louie JK, Acosta M, Winter K, Jean C, Gavali S, Schechter R, Vugia D, Harriman K,  
382 Matyas B, Glaser CA, Samuel MC, Rosenberg J, Talarico J, Hatch D, California  
383 Pandemic Working G. Factors associated with death or hospitalization due to  
384 pandemic 2009 influenza A(H1N1) infection in California. *JAMA* 2009; 302: 1896-  
385 1902.
- 386 7. McCullers JA, Bartmess KC. Role of Neuraminidase in Lethal Synergism between  
387 Influenza Virus and *Streptococcus pneumoniae*. *Journal of Infectious Diseases*  
388 2003; 187: 1000-1009.

- 389 8. Hentrich K, Löfling J, Pathak A, Nizet V, Varki A, Henriques-Normark B.  
390 Streptococcus pneumoniae Senses a Human-like Sialic Acid Profile via the  
391 Response Regulator CiaR. *Cell Host & Microbe* 2016; 20: 307-317.
- 392 9. Brand JD, Lazrak A, Trombley JE, Shei RJ, Adewale AT, Tipper JL, Yu Z, Ashtekar  
393 AR, Rowe SM, Matalon S, Harrod KS. Influenza-mediated reduction of lung  
394 epithelial ion channel activity leads to dysregulated pulmonary fluid homeostasis.  
395 *JCI Insight* 2018; 3.
- 396 10. Pettigrew MM, Marks LR, Kong Y, Gent JF, Roche-Hakansson H, Hakansson AP.  
397 Dynamic changes in the Streptococcus pneumoniae transcriptome during  
398 transition from biofilm formation to invasive disease upon influenza A virus  
399 infection. *Infection and immunity* 2014; 82: 4607-4619.
- 400 11. Sun K, Metzger DW. Inhibition of pulmonary antibacterial defense by interferon-  
401 [gamma] during recovery from influenza infection. *Nat Med* 2008; 14: 558-564.
- 402 12. Shahangian A, Chow EK, Tian X, Kang JR, Ghaffari A, Liu SY, Belperio JA, Cheng  
403 G, Deng JC. Type I IFNs mediate development of postinfluenza bacterial  
404 pneumonia in mice. *The Journal of Clinical Investigation*; 119: 1910-1920.
- 405 13. van der Sluijs KF, Nijhuis M, Levels JH, Florquin S, Mellor AL, Jansen HM, van der  
406 Poll T, Lutter R. Influenza-induced expression of indoleamine 2,3-dioxygenase  
407 enhances interleukin-10 production and bacterial outgrowth during secondary  
408 pneumococcal pneumonia. *The Journal of infectious diseases* 2006; 193: 214-  
409 222.

- 410 14. Vandenabeele P, Galluzzi L, Vanden Berghe T, Kroemer G. Molecular mechanisms  
411 of necroptosis: an ordered cellular explosion. *Nat Rev Mol Cell Biol* 2010; 11:  
412 700-714.
- 413 15. Moreno-Gonzalez G, Vandenabeele P, Krysko DV. Necroptosis: A Novel Cell Death  
414 Modality and Its Potential Relevance for Critical Care Medicine. *Am J Respir Crit*  
415 *Care Med* 2016; 194: 415-428.
- 416 16. Gonzalez-Juarbe N, Bradley KM, Riegler AN, Reyes LF, Brissac T, Park SS,  
417 Restrepo MI, Orihuela CJ. Bacterial Pore-Forming Toxins Promote the Activation  
418 of Caspases in Parallel to Necroptosis to Enhance Alarmin Release and  
419 Inflammation During Pneumonia. *Sci Rep* 2018; 8: 5846.
- 420 17. Gonzalez-Juarbe N, Bradley KM, Shenoy AT, Gilley RP, Reyes LF, Hinojosa CA,  
421 Restrepo MI, Dube PH, Bergman MA, Orihuela CJ. Pore-forming toxin-mediated  
422 ion dysregulation leads to death receptor-independent necroptosis of lung  
423 epithelial cells during bacterial pneumonia. *Cell Death Differ* 2017; 24: 917-928.
- 424 18. Nogusa S, Thapa RJ, Dillon CP, Liedmann S, Oguin TH, 3rd, Ingram JP, Rodriguez  
425 DA, Kosoff R, Sharma S, Sturm O, Verbist K, Gough PJ, Bertin J, Hartmann BM,  
426 Sealfon SC, Kaiser WJ, Mocarski ES, Lopez CB, Thomas PG, Oberst A, Green  
427 DR, Balachandran S. RIPK3 Activates Parallel Pathways of MLKL-Driven  
428 Necroptosis and FADD-Mediated Apoptosis to Protect against Influenza A Virus.  
429 *Cell Host Microbe* 2016; 20: 13-24.
- 430 19. Wang Y, Hao Q, Florence JM, Jung BG, Kurdowska AK, Samten B, Idell S, Tang H.  
431 Influenza Virus Infection Induces ZBP1 Expression and Necroptosis in Mouse  
432 Lungs. *Front Cell Infect Microbiol* 2019; 9: 286.

- 433 20. Thapa RJ, Ingram JP, Ragan KB, Nogusa S, Boyd DF, Benitez AA, Sridharan H,  
434 Kosoff R, Shubina M, Landsteiner VJ, Andrade M, Vogel P, Sigal LJ, tenOever  
435 BR, Thomas PG, Upton JW, Balachandran S. DAI Senses Influenza A Virus  
436 Genomic RNA and Activates RIPK3-Dependent Cell Death. *Cell Host Microbe*  
437 2016; 20: 674-681.
- 438 21. Gonzalez-Juarbe N, Bradley KM, Shenoy AT, Gilley RP, Reyes LF, Hinojosa CA,  
439 Restrepo MI, Dube PH, Bergman MA, Orihuela CJ. Pore-forming toxin-mediated  
440 ion dysregulation leads to death receptor-independent necroptosis of lung  
441 epithelial cells during bacterial pneumonia. *Cell Death Differ* 2017.
- 442 22. Gonzalez-Juarbe N, Gilley RP, Hinojosa CA, Bradley KM, Kamei A, Gao G, Dube  
443 PH, Bergman MA, Orihuela CJ. Pore-Forming Toxins Induce Macrophage  
444 Necroptosis during Acute Bacterial Pneumonia. *PLoS Pathog* 2015; 11:  
445 e1005337.
- 446 23. Fulcher ML, Gabriel S, Burns KA, Yankaskas JR, Randell SH. Well-differentiated  
447 human airway epithelial cell cultures. *Methods Mol Med* 2005; 107: 183-206.
- 448 24. Tettelin H, Nelson KE, Paulsen IT, Eisen JA, Read TD, Peterson S, Heidelberg J,  
449 DeBoy RT, Haft DH, Dodson RJ, Durkin AS, Gwinn M, Kolonay JF, Nelson WC,  
450 Peterson JD, Umayam LA, White O, Salzberg SL, Lewis MR, Radune D,  
451 Holtzapple E, Khouri H, Wolf AM, Utterback TR, Hansen CL, McDonald LA,  
452 Feldblyum TV, Angiuoli S, Dickinson T, Hickey EK, Holt IE, Loftus BJ, Yang F,  
453 Smith HO, Venter JC, Dougherty BA, Morrison DA, Hollingshead SK, Fraser CM.  
454 Complete genome sequence of a virulent isolate of *Streptococcus pneumoniae*.  
455 *Science* 2001; 293: 498-506.

- 456 25. Lizcano A, Chin T, Sauer K, Tuomanen EI, Orihuela CJ. Early biofilm formation on  
457 microtiter plates is not correlated with the invasive disease potential of  
458 *Streptococcus pneumoniae*. *Microbial pathogenesis* 2010; 48: 124-130.
- 459 26. Zafar MA, Wang Y, Hamaguchi S, Weiser JN. Host-to-Host Transmission of  
460 *Streptococcus pneumoniae* Is Driven by Its Inflammatory Toxin, Pneumolysin.  
461 *Cell Host Microbe* 2017; 21: 73-83.
- 462 27. Brown AO, Mann B, Gao G, Hankins JS, Humann J, Giardina J, Faverio P,  
463 Restrepo MI, Halade GV, Mortensen EM, Lindsey ML, Hanes M, Happel KI,  
464 Nelson S, Bagby GJ, Lorent JA, Cardinal P, Granados R, Esteban A, LeSaux CJ,  
465 Tuomanen EI, Orihuela CJ. *Streptococcus pneumoniae* translocates into the  
466 myocardium and forms unique microlesions that disrupt cardiac function. *PLoS*  
467 *Pathog* 2014; 10: e1004383.
- 468 28. Murphy JM, Czabotar PE, Hildebrand JM, Lucet IS, Zhang JG, Alvarez-Diaz S,  
469 Lewis R, Lalaoui N, Metcalf D, Webb AI, Young SN, Varghese LN, Tannahill GM,  
470 Hatchell EC, Majewski IJ, Okamoto T, Dobson RC, Hilton DJ, Babon JJ, Nicola  
471 NA, Strasser A, Silke J, Alexander WS. The pseudokinase MLKL mediates  
472 necroptosis via a molecular switch mechanism. *Immunity* 2013; 39: 443-453.
- 473 29. Gonzalez-Juarbe N, Mares CA, Hinojosa CA, Medina JL, Cantwell A, Dube PH,  
474 Orihuela CJ, Bergman MA. Requirement for *Serratia marcescens* cytolysin in a  
475 murine model of hemorrhagic pneumonia. *Infect Immun* 2015; 83: 614-624.
- 476 30. Saxena RK, Gilmour MI, Hays MD. Isolation and quantitative estimation of diesel  
477 exhaust and carbon black particles ingested by lung epithelial cells and alveolar  
478 macrophages in vitro. *Biotechniques* 2008; 44: 799-805.

- 479 31. Gilley RP, Gonzalez-Juarbe N, Shenoy AT, Reyes LF, Dube PH, Restrepo MI,  
480 Orihuela CJ. Infiltrated Macrophages Die of Pneumolysin-Mediated Necroptosis  
481 following Pneumococcal Myocardial Invasion. *Infect Immun* 2016; 84: 1457-1469.
- 482 32. Schindelin J, Rueden CT, Hiner MC, Eliceiri KW. The ImageJ ecosystem: An open  
483 platform for biomedical image analysis. *Mol Reprod Dev* 2015; 82: 518-529.
- 484 33. Riegler AN, Brissac T, Gonzalez-Juarbe N, Orihuela CJ. Necroptotic Cell Death  
485 Promotes Adaptive Immunity Against Colonizing Pneumococci. *Front Immunol*  
486 2019; 10: 615.
- 487 34. McCullers JA, Hayden FG. Fatal influenza B infections: time to reexamine influenza  
488 research priorities. *J Infect Dis* 2012; 205: 870-872.
- 489 35. McCullers JA, Tuomanen EI. Molecular pathogenesis of pneumococcal pneumonia.  
490 *Front Biosci* 2001; 6: D877-D889.
- 491 36. Hoffmann J, Machado D, Terrier O, Pouzol S, Messaoudi M, Basualdo W, Espinola  
492 EE, Guillen RM, Rosa-Calatrava M, Picot V, Benet T, Endtz H, Russomando G,  
493 Paranhos-Baccala G. Viral and bacterial co-infection in severe pneumonia  
494 triggers innate immune responses and specifically enhances IP-10: a  
495 translational study. *Sci Rep* 2016; 6: 38532.
- 496 37. Upton JW, Shubina M, Balachandran S. RIPK3-driven cell death during virus  
497 infections. *Immunol Rev* 2017; 277: 90-101.
- 498 38. Morris DE, Cleary DW, Clarke SC. Secondary Bacterial Infections Associated with  
499 Influenza Pandemics. *Frontiers in microbiology* 2017; 8: 1041-1041.
- 500 39. Liu M, Chen F, Liu T, Chen F, Liu S, Yang J. The role of oxidative stress in influenza  
501 virus infection. *Microbes Infect* 2017; 19: 580-586.

- 502 40. Brissac T, Shenoy AT, Patterson LA, Orihuela CJ. Cell invasion and pyruvate  
503 oxidase derived H<sub>2</sub>O<sub>2</sub> are critical for *Streptococcus pneumoniae* mediated  
504 cardiomyocyte killing. *Infect Immun* 2017.
- 505 41. Takahashi K, Furuta Y, Fukuda Y, Kuno M, Kamiyama T, Kozaki K, Nomura N,  
506 Egawa H, Minami S, Shiraki K. In vitro and in vivo activities of T-705 and  
507 oseltamivir against influenza virus. *Antivir Chem Chemother* 2003; 14: 235-241.
- 508 42. Byrn RA, Jones SM, Bennett HB, Bral C, Clark MP, Jacobs MD, Kwong AD,  
509 Ledebouer MW, Leeman JR, McNeil CF, Murcko MA, Nezami A, Perola E,  
510 Rijnbrand R, Saxena K, Tsai AW, Zhou Y, Charifson PS. Preclinical activity of  
511 VX-787, a first-in-class, orally bioavailable inhibitor of the influenza virus  
512 polymerase PB2 subunit. *Antimicrob Agents Chemother* 2015; 59: 1569-1582.
- 513 43. Helbock HJ, Beckman KB, Ames BN. 8-Hydroxydeoxyguanosine and 8-  
514 hydroxyguanine as biomarkers of oxidative DNA damage. *Methods Enzymol*  
515 1999; 300: 156-166.
- 516 44. Kruman I, Bruce-Keller AJ, Bredesen D, Waeg G, Mattson MP. Evidence that 4-  
517 hydroxynonenal mediates oxidative stress-induced neuronal apoptosis. *J*  
518 *Neurosci* 1997; 17: 5089-5100.
- 519 45. Yeganeh B, Rezaei Moghadam A, Tran AT, Rahim MN, Ande SR, Hashemi M,  
520 Coombs KM, Ghavami S. Asthma and influenza virus infection: focusing on cell  
521 death and stress pathways in influenza virus replication. *Iran J Allergy Asthma*  
522 *Immunol* 2013; 12: 1-17.
- 523 46. Tong HH, Fisher LM, Kosunick GM, DeMaria TF. Effect of adenovirus type 1 and  
524 influenza A virus on *Streptococcus pneumoniae* nasopharyngeal colonization



525           and otitis media in the chinchilla. *Ann Otol Rhinol Laryngol* 2000; 109: 1021-  
526           1027.

527   47. Schwarz KB. Oxidative stress during viral infection: a review. *Free Radic Biol Med*  
528           1996; 21: 641-649.

529   48. Hosakote YM, Liu T, Castro SM, Garofalo RP, Casola A. Respiratory syncytial virus  
530           induces oxidative stress by modulating antioxidant enzymes. *Am J Respir Cell*  
531           *Mol Biol* 2009; 41: 348-357.

532

533

534 **Figures:**

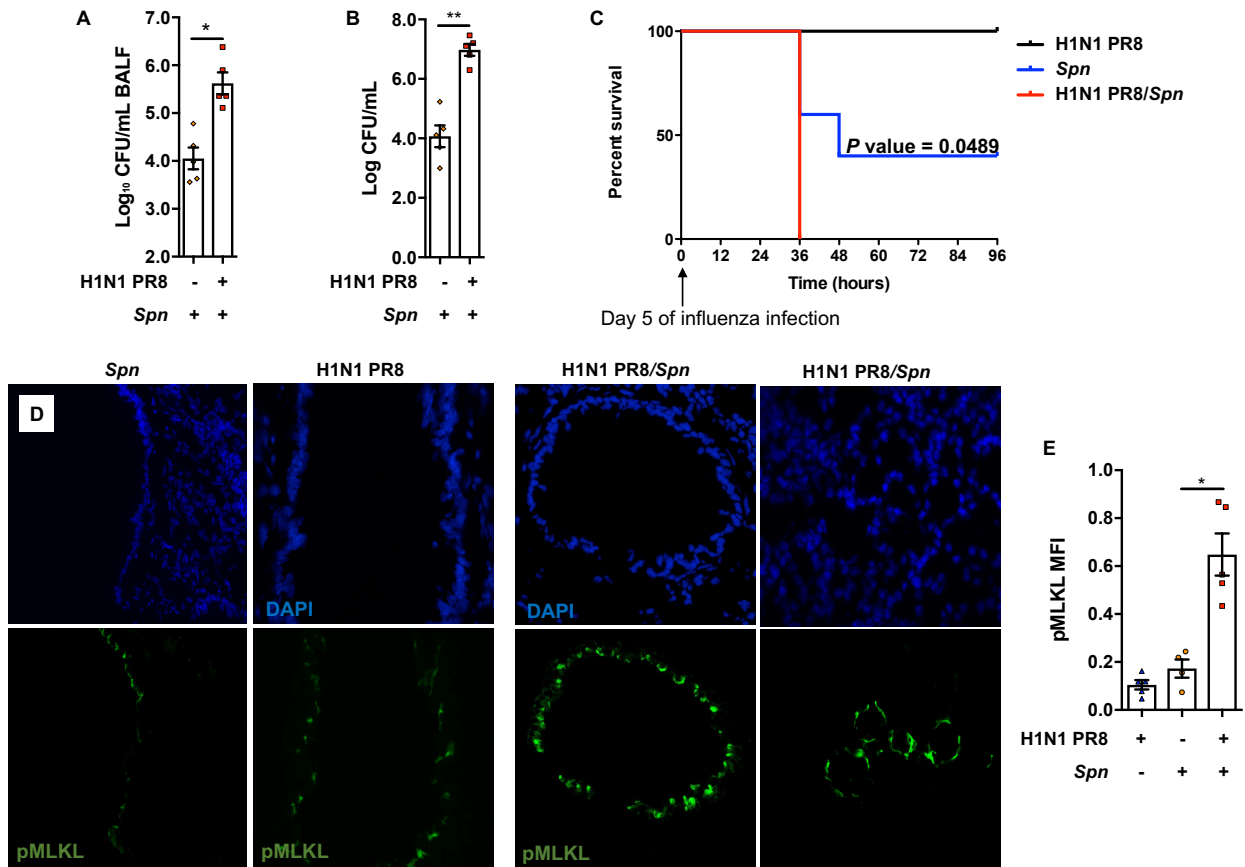

535

536 **Figure 1: IAV/*Spn* co-infection leads to increased mortality and enhanced tissue**  
 537 **necroptosis.** 8-week-old C57Bl/6 mice were intranasally infected with H1N1 PR8 (250  
 538 PFU) for 5 days and subsequently challenged intratracheally with *Spn* strain TIGR4 at  
 539 the LD<sub>50</sub> dose of 5 x 10<sup>5</sup> CFU. Mice were euthanized 24-hours post-secondary infection  
 540 (n=4-5 mice/cohort). Bacterial titers in **A**) bronchoalveolar lavage (BALF) and **B**) blood  
 541 of mice at time of sacrifice. **C**) Survival of mice challenged with IAV, *Spn*, or co-infected  
 542 with *Spn* after 5 days of IAV (n=5); **D**) corresponding and representative images of  
 543 frozen lung sections from infected mice immunofluorescent stained for p-MLKL (green)  
 544 (n=4-5/cohort). **E**) Shown is the quantitation of p-MLKL levels in captured images  
 545 calculated by mean fluorescent intensity.

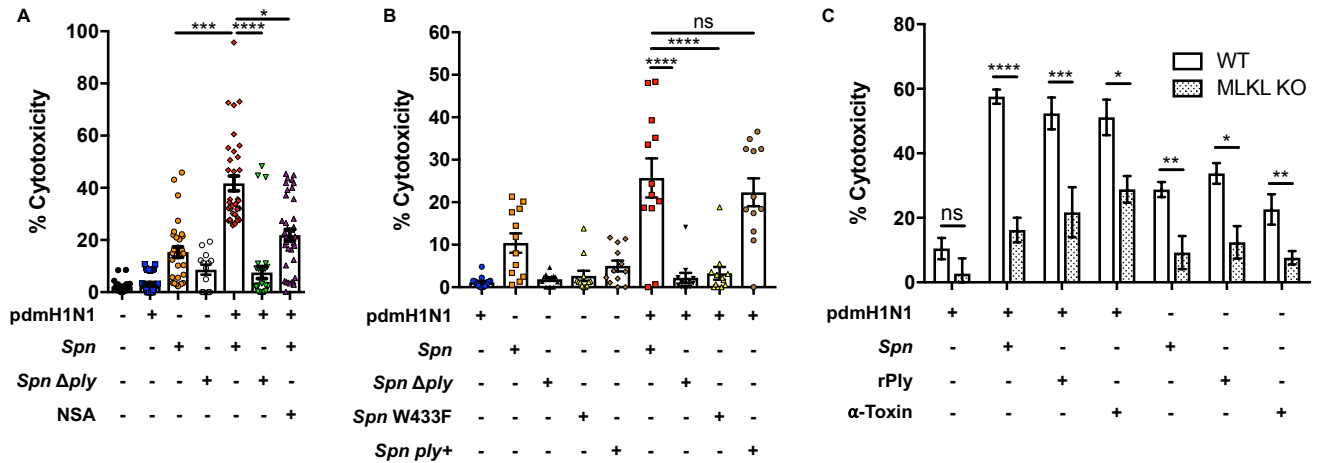

546

547 **Figure 2: IAV infection promotes PFT-mediated cell death. A)** LDH release was  
 548 measured from A549 cells following infection with influenza A/California/7/2009  
 549 (pdmH1N1) at a MOI of 2 for 2 hours and challenge with wildtype *Spn* (*Spn*, in house  
 550 strain) or Ply deficient derivative (*Spn  $\Delta$ ply*) at an MOI of 10 for 4 additional hours. Cells  
 551 were treated with necrosulfonamide (NSA, 10 $\mu$ M) when indicated. **B)** LDH cytotoxicity  
 552 assay of supernatants from A549 cells was performed following infection with pdmH1N1  
 553 at an MOI of 2 for 2 hours and challenge with *Spn* strains and mutants obtained from  
 554 Dr. Jeffrey Weiser at an MOI of 10 for 4 hours: *Spn* TIGR4 WT (*Spn*), Ply deficient  
 555 mutant (*Spn  $\Delta$ ply*), Ply point mutant deficient in pore formation (*Spn W433F*), and  
 556 corrected mutant (*Spn ply+*). **C)** Cytotoxicity of A549 wildtype (white bars) or A549  
 557 MLKL deficient cells (dotted bars) was measured following the same challenge model  
 558 as in panel a using *Spn*, recombinant pneumolysin (rPly), or alpha-toxin ( $\alpha$ -Toxin).

559

560

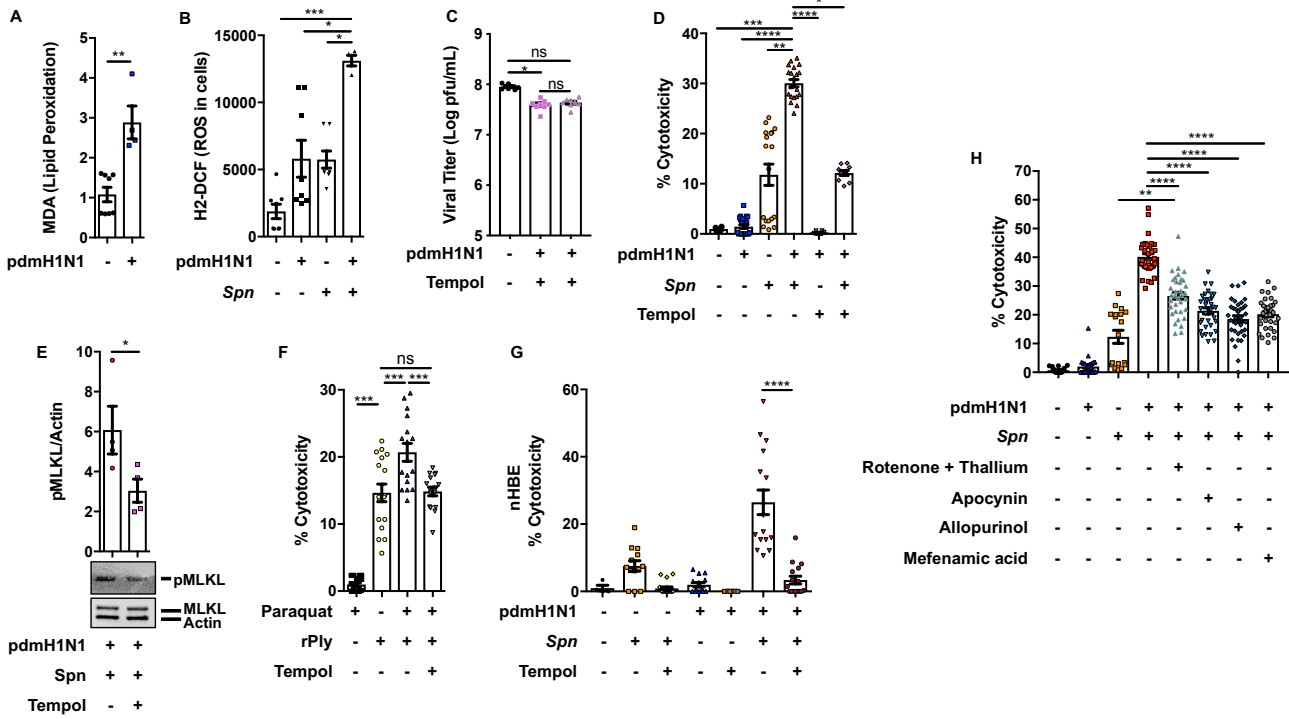

561

562 **Figure 3: IAV-mediated oxidative stress potentiates pneumolysin-mediated**

563 **necroptosis. A)** Lipid peroxidation levels 4-hours after challenge with pdmH1N1 was

564 measured by MDA. **B)** Levels of cellular ROS measured in A549 cells infected with

565 pdmH1N1 at a MOI 2 for 2 hours then challenged with *Spn* at a MOI of 10 for 2 more

566 hours. **C)** Viral titers quantified (Log PFU/mL) in A549 cells treated with Tempol (20 $\mu$ M)

567 for 1-hour or 24-hours. **D)** Cytotoxicity and **E)** corresponding p-MLKL levels in A549

568 cells that were pre-treated with Tempol for 1-hour, infected with pdmH1N1 at a MOI 2

569 for 2 hours, then challenged with *Spn* at an MOI of 10 for 4 additional hours. **F)**

570 Cytotoxicity was measured in A549 cells pre-treated with Tempol, then treated with

571 Paraquat (10 $\mu$ M) for additional 2 hours, followed by challenge with rPly (0.1 $\mu$ g) for 2

572 hours. **G)** Cytotoxicity of *ex vivo* cultured primary normal human bronchial epithelial

573 cells pre-treated with Tempol for 1-hour, infected with pdmH1N1 at a MOI 2 for 2 hours,

574 and challenged with *Spn* at an MOI of 10 for 4 additional hours. **H)** LDH release from

575 A549 cells pretreated with Rotenone + Thallium trifluoroacetate (10 nM/mL/10 nM/mL),  
576 a mitochondria-dependent ROS inhibitor; Apocynin (1 $\mu$ M/mL), a NADPH-dependent  
577 ROS inhibitor; Allopurinol (10nM/mL), a xanthine oxidase-dependent ROS inhibitor; and  
578 Mefenamic acid (20nM/mL), a cyclooxygenase-dependent ROS inhibitor following IAV  
579 and *Spn*, individually and together.

580

581

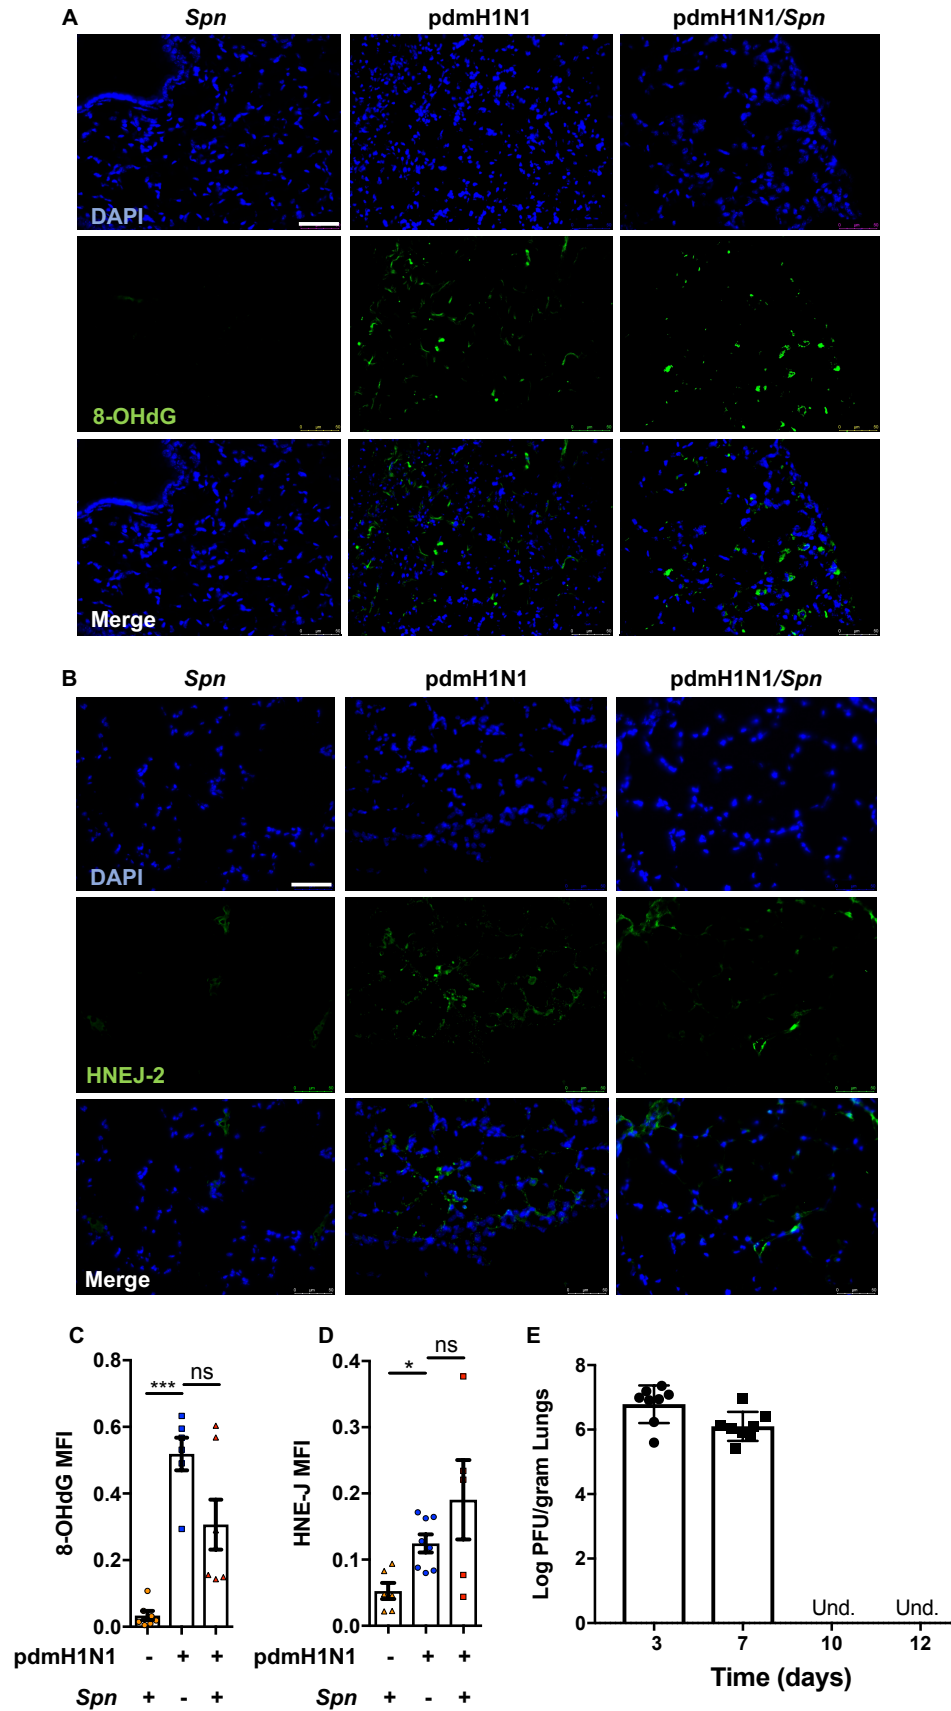

583 **Figure 4: IAV-mediated oxidative stress persists after virus clearance *in vivo*.** 8-  
584 week-old C57Bl/6 mice were intranasally infected with A/California/7/2009 (pdmH1N1)  
585 and 10 days later challenged intratracheally with *S. pneumoniae* (*Spn*). Mice were  
586 euthanized 48 hours after secondary infection (n=6-8 mice). Shown are representative  
587 immunofluorescent lung sections stained for **A)** 8-Hydroxydeoxyguanosine (8-OHdG)  
588 and **B)** 4-Hydroxynonenal (HNE-J). White bar denotes 50µm. **C-D)** Quantification of the  
589 mean fluorescent intensity (MFI) of 8-OHdG and HNE-J staining's, respectively, was  
590 performed. **E)** Viral titers (Log PFU/gram) in lungs at days 3, 7, 10 and 12 post-IAV  
591 infection (n=8 mice per group) are indicated.

592

593

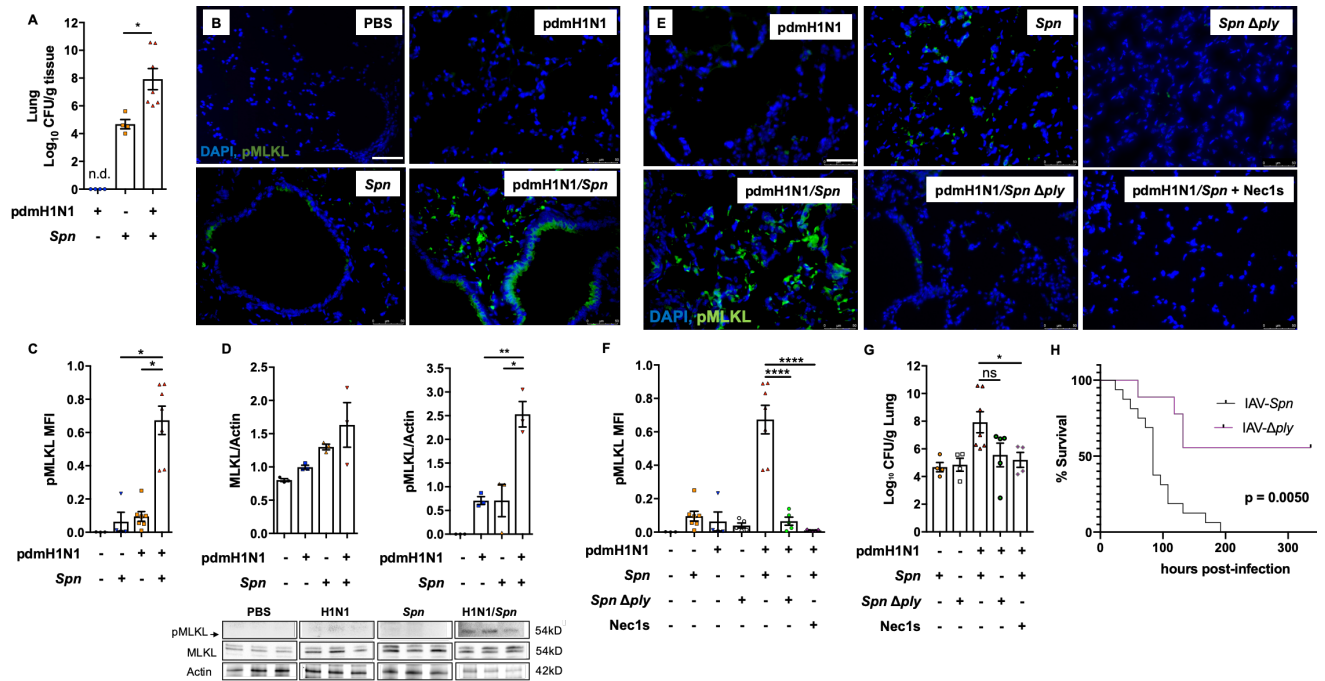

594

595 **Figure 5: Influenza infection potentiates pneumolysin induced necroptosis**  
 596 **activation during secondary *S. pneumoniae* challenge.** 8-week-old C57Bl/6 mice  
 597 were intranasally infected with A/California/7/2009 (pdmH1N1) and 10 days later  
 598 challenged intratracheally with *S. pneumoniae* (*Spn*). Mice were euthanized 48 hours  
 599 after secondary infection (n=3-7 mice). Shown are **A**) bacterial titers in homogenized  
 600 lung samples, as well as **B**) representative images of corresponding lung sections  
 601 stained for p-MLKL (3 sections stained per mouse). White bar denotes 50µm. **C**) Mean  
 602 fluorescent intensity (MFI) for p-MLKL activity was measured. **D**) Densitometry and  
 603 western blots for p-MLKL, MLKL and actin from mock, *Spn*, pdmH1N1 and  
 604 pdmH1N1/*Spn* infected mice (n=3/cohort). **E-G**) 8-week-old C57Bl/6 mice were  
 605 intranasally infected with A/California/7/2009 (pdmH1N1) and 10 days later challenged  
 606 intratracheally with *Spn* or *Spn* Δply. Mice were euthanized 48 hours after secondary  
 607 infection (n=4-7 mice). Treatment with Nec1s was done intraperitoneally at 12 and 24  
 608 hours following bacterial challenge. **E**) Shown are representative images of lung tissue



609 sections stained for p-MLKL (separate points are average of 3 pictures per mouse) and  
610 **F)** mean fluorescent intensity of pMLKL staining. Corresponding **G)** lung bacterial titers  
611 (CFU/g tissue) calculated. **H)** Survival of C57Bl/6 mice following intranasal infection with  
612 pdmH1N1 for 10 days and subsequent intratracheal challenge with *Spn* or *Spn Δply*  
613 was monitored.

614

615

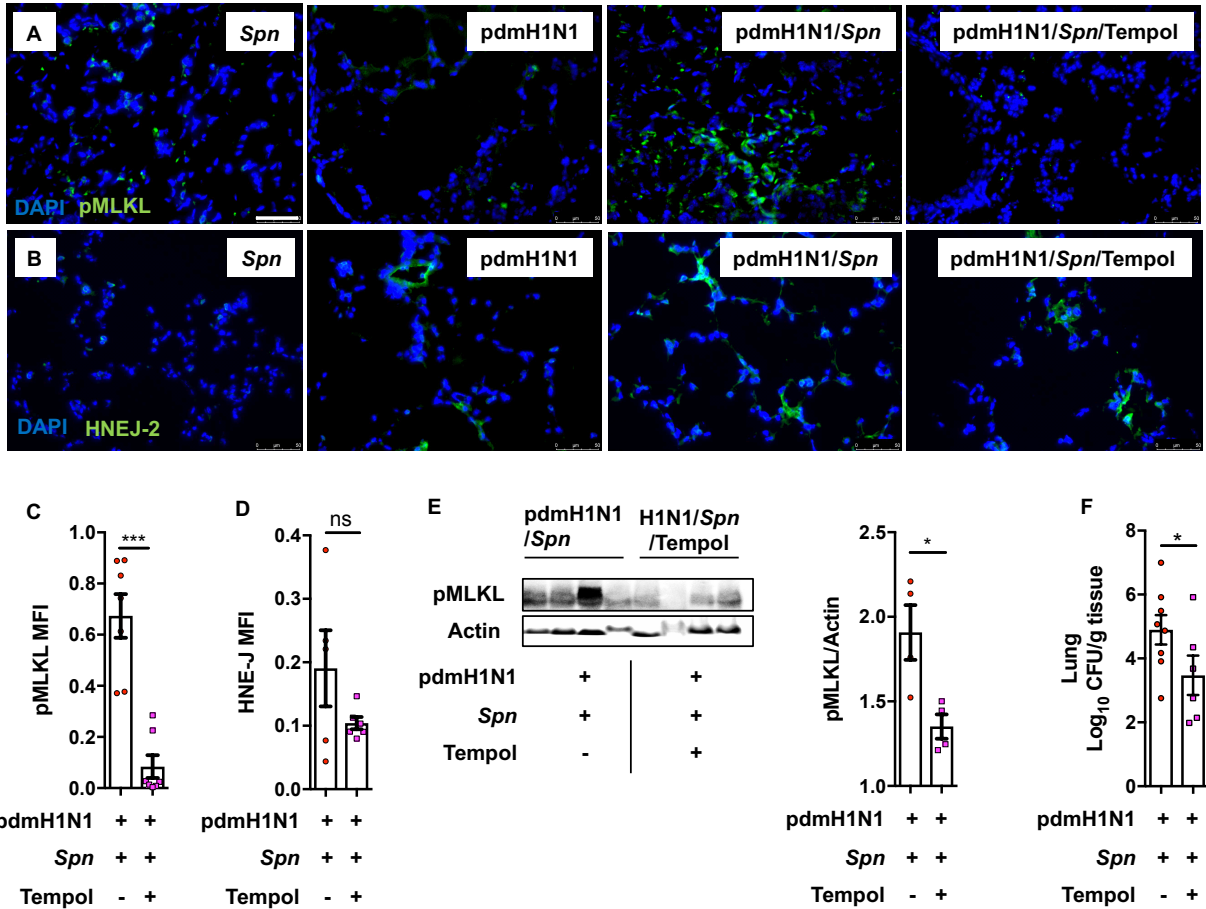

616

617 **Figure 6: Therapeutic neutralization of ROS reduces necroptosis activation**  
 618 **during secondary bacterial pneumonia.** 8-week-old C57Bl/6 mice were intranasally  
 619 infected with A/California/7/2009 (pdmH1N1) and 10 days later challenged  
 620 intratracheally with *S. pneumoniae* (*Spn*). Mice were euthanized 48 hours after  
 621 secondary infection (n=5-8 mice). Tempol treatment was done intraperitoneally at 12  
 622 and 24 hours post bacterial infection. Representative images of lung sections  
 623 immunofluorescent stained for **A)** p-MLKL and **B)** 4 Hydroxynonenal (HNE-J). White bar  
 624 denotes 50µm. **C-D)** Quantification of the mean fluorescent intensity (MFI) in  
 625 corresponding captured images. **E)** Immunoblot for pMLKL and actin of pdmH1N1  
 626 infected mice, challenged with *Spn* with subsequent Tempol treatment and its  
 627 densitometry quantification. **F)** Bacterial titers measured in lungs at time of death.

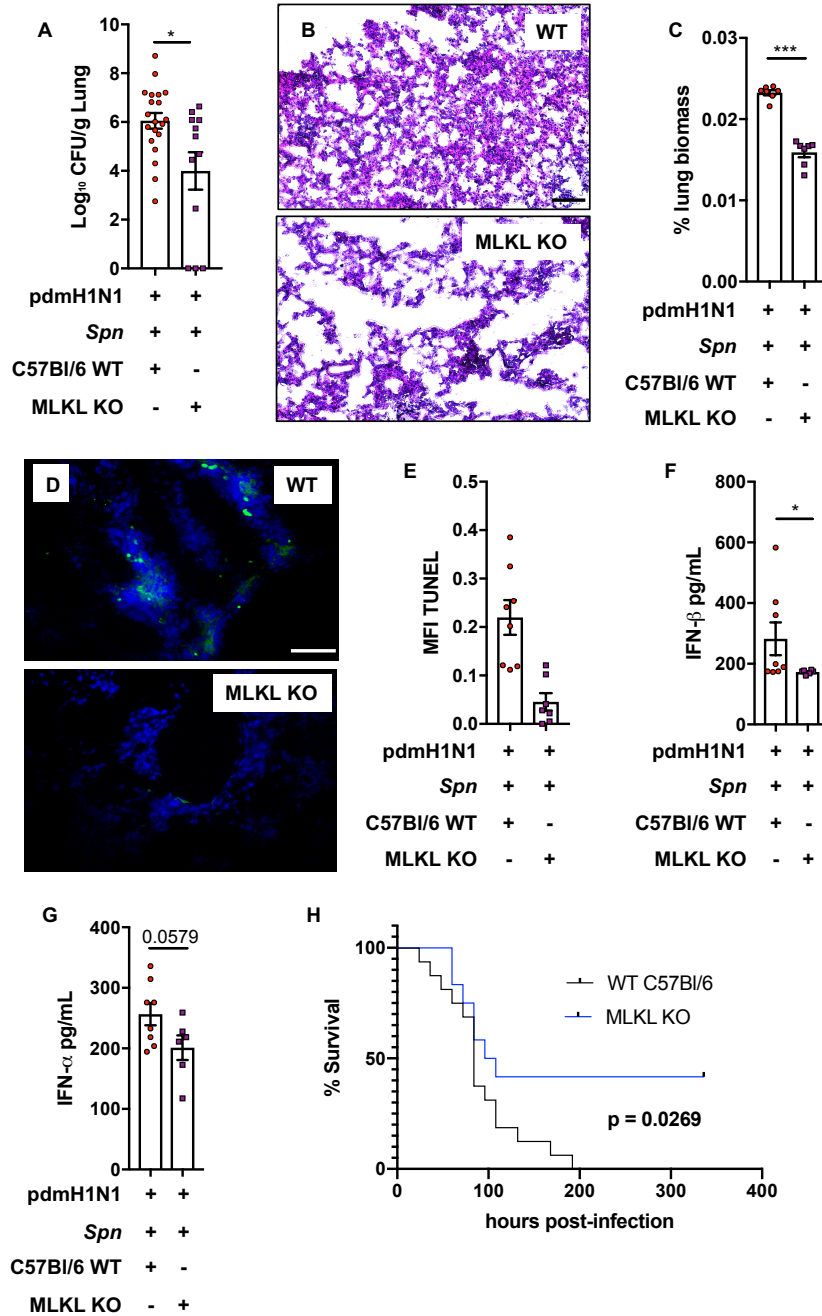

628

629 **Figure 7: Inhibition of necroptosis reduces disease severity and tissue injury**  
 630 **during secondary bacterial pneumonia.** 8-week-old C57Bl/6 mice were intranasally  
 631 infected with A/California/7/2009 (pdmH1N1) and 10 days later challenged  
 632 intratracheally with *S. pneumoniae* (*Spn*). Mice were euthanized 48 hours after  
 633 secondary infection (n>12 mice). **A)** Measured bacterial titers in homogenized lungs. **B)**

634 Representative H&E staining of corresponding tissue sections. Black bar denotes  
635 100 $\mu$ m. **C**) Lung consolidation in tissue sections as measured using ImageJ (white  
636 space versus lung area, separate points are the average of 3 pictures per mouse). **D**)  
637 TUNEL stain (white bar denotes 50 $\mu$ m) and **E**) mean fluorescent intensity of TUNEL  
638 stain quantified in lung sections. **F**) IFN- $\beta$  and **G**) IFN- $\alpha$  levels (pg/mL) in lung  
639 homogenates. **H**) Survival of 8-week-old WT and MLKL KO-C57Bl/6 in the secondary  
640 *Spn* infection model.
